# Supplementary material for: Road Traffic Death Rate and Human Development Index in 2007-2016 at the Global Level: Trend Analysis
Source: Research Square preprint supplement (doi:10.21203/rs.3.rs-1220902/v1), 2022-02-03
Supplement: Supplementary file 2 [file 44f0ac4d9f5e10cebda153c7.xlsx]

## Sheet: Additional file 2
Country	RTDR2007	RTDR2010	RTDR2013	RTDR2016	Slope	binary slope	mean mortality	meanhdi	hdi category	mean life expectany	mean education	mean income	hdi slope	income slope	life expectany slope	education slope
Afghanis	39	19.77	15.5	15.1	-1.408	0	22.3425	0.46775	4	0.641	0.378	0.423	0.017	0.011	0.016	0.022
Albania	13.9	12.73	15.1	13.6	-0.574	0	13.8325	0.75675	2	0.8765	0.70975	0.69725	0.022	0.013	0.013	0.036
Angola	37.7	23.1	26.9	23.6	-0.578	0	27.825	0.52725	4	0.5595	0.427	0.61525	0.028	0.006	0.026	0.036
Argentin	13.7	12.61	13.6	14	-0.522	0	13.4775	0.819	1	0.854	0.8175	0.78725	0.007	0.002	0.007	0.012
Armenia	13.9	18.05	18.3	17.1	-0.354	0	16.8375	0.73675	2	0.8265	0.73725	0.65675	0.01	0.008	0.013	0.013
Australi	7.8	6.12	5.4	5.6	-1.029	0	6.23	0.92375	1	0.95675	0.90575	0.90925	0.008	0.006	0.01	0.012
Austria	8.3	6.59	5.4	5.2	-1.1	0	6.3725	0.89525	1	0.9345	0.83525	0.92	0.009	0.002	0	0.019
Azerbaij	13	13.08	10	8.7	-1.062	0	11.195	0.7335	2	0.78825	0.66825	0.749	0.011	0.01	0.005	0.01
Banglade	12.6	11.63	13.6	15.3	-0.325	0	13.2825	0.56025	3	0.774	0.445	0.51025	0.025	0.02	0.011	0.032
Belarus	15.7	14.42	13.7	8.9	-1.166	0	13.18	0.792	2	0.79475	0.82	0.76225	0.015	0.007	0.029	0.018
Belgium	10.2	8.11	6.7	5.8	-1.139	0	7.7025	0.90625	1	0.928	0.87875	0.91275	0.006	0.001	0.009	0.009
Benin	31.2	23.94	27.7	27.5	0.013	1	27.585	0.485	4	0.61	0.423	0.443	0.019	0.007	0.001	0.033
Bolivia	16.7	19.23	23.2	15.5	-0.646	0	18.6575	0.66475	3	0.74825	0.64925	0.60425	0.018	0.016	0.017	0.017
Bosnia a	10.9	15.64	17.7	15.7	-0.339	0	14.985	0.735	2	0.86575	0.6535	0.702	0.019	0.011	0.006	0.032
Botswana	33.8	20.78	23.6	23.8	-0.368	0	25.495	0.67575	3	0.6475	0.64225	0.7445	0.028	0.012	0.063	0.012
Brazil	18.3	22.5	23.4	19.7	-0.346	0	20.975	0.735	2	0.83075	0.64	0.7475	0.016	0.003	0.011	0.03
Bulgaria	13.2	10.35	8.3	10.2	-0.838	0	10.5125	0.78675	2	0.83025	0.77125	0.7605	0.016	0.013	0.003	0.025
Burkina	31.1	27.73	30	30.5	0.226	1	29.8325	0.385	4	0.58175	0.24325	0.40475	0.024	0.01	0.015	0.029
Cambodia	12.1	17.19	17.4	17.8	-0.2	0	16.1225	0.5445	4	0.72375	0.45	0.49575	0.018	0.019	0.011	0.016
Cameroon	28.1	20.07	27.6	30.1	0.487	1	26.4675	0.50975	4	0.55175	0.47175	0.51175	0.029	0.009	0.021	0.047
Canada	8.8	6.75	6	5.8	-1.058	0	6.8375	0.904	1	0.94575	0.8575	0.91025	0.011	0.003	0.005	0.02
Central	32.2	14.63	32.4	33.6	0.863	1	28.2075	0.353	4	0.438	0.319	0.3165	0.013	-0.01	0.038	0.022
Chad	34.3	29.74	24.1	27.6	-0.228	0	28.935	0.379	4	0.4845	0.25875	0.4335	0.016	0.008	0.008	0.018
Chile	13.7	12.11	12.4	12.5	-0.664	0	12.6775	0.8185	1	0.90775	0.76025	0.7935	0.016	0.013	0.007	0.021
China	16.5	20.8	18.8	18.2	-0.396	0	18.575	0.712	2	0.84425	0.61025	0.7015	0.024	0.03	0.017	0.025
Colombia	11.7	15.61	16.8	18.5	-0.071	0	15.6525	0.73675	2	0.85775	0.6515	0.715	0.015	0.013	0.009	0.02
Congo	28.8	17.12	26.4	27.4	0.263	1	24.93	0.5685	3	0.628	0.5065	0.5775	0.028	0.035	0.017	0.021
Democrat	32.2	20.87	33.2	33.7	0.706	1	29.9925	0.42	4	0.577	0.4465	0.2875	0.022	0.015	0.011	0.03
Costa Ri	15.4	15.65	13.9	16.7	-0.376	0	15.4125	0.7655	2	0.908	0.67175	0.73575	0.016	0.01	0.01	0.027
Croatia	13.6	10.36	9.2	8.1	-1.07	0	10.315	0.81725	1	0.87825	0.77125	0.806	0.01	0.001	0.007	0.02
Cuba	8.6	7.75	7.5	8.5	-0.798	0	8.0875	0.76925	2	0.89825	0.79375	0.63875	0.002	0.011	-0.004	-0.01
Cyprus	10.4	7.61	5.2	5.1	-1.204	0	7.0775	0.85425	1	0.9185	0.78025	0.869	0.009	-0.002	0.01	0.019
Czech Re	12	7.64	6.1	5.9	-1.173	0	7.91	0.86775	1	0.89075	0.8655	0.847	0.012	0.006	0.01	0.019
Ecuador	11.7	27.04	20.1	21.3	-0.088	0	20.035	0.73225	2	0.85275	0.66975	0.689	0.017	0.009	0.01	0.029
Egypt	41.6	13.23	12.8	9.7	-1.878	0	19.3325	0.67325	3	0.77925	0.56675	0.69125	0.015	0.006	0.005	0.024
El Salva	12.6	21.93	21.1	22.2	0.113	1	19.4575	0.65675	3	0.79375	0.57025	0.6265	0.005	0.007	0.011	0.002
Estonia	14.7	6.49	7	6.1	-1.209	0	8.5725	0.85525	1	0.8615	0.87125	0.8345	0.013	0.009	0.024	0.009
Ethiopia	35	17.61	25.3	26.7	-0.02	0	26.1525	0.422	4	0.652	0.30875	0.373	0.026	0.029	0.018	0.017
Finland	7.2	5.07	4.8	4.7	-1.075	0	5.4425	0.9105	1	0.9295	0.89425	0.908	0.008	-0.001	0.011	0.014
France	7.5	6.36	5.1	5.5	-1.036	0	6.115	0.877	1	0.94875	0.792	0.8985	0.007	0.002	0.005	0.012
Gambia	36.6	18.8	29.4	29.7	0.206	1	28.625	0.44125	4	0.615	0.34725	0.4025	0.011	0.002	0.001	0.017
Georgia	16.8	15.74	11.8	15.3	-0.568	0	14.91	0.747	2	0.7995	0.799	0.65275	0.018	0.015	0.016	0.026
Germany	6	4.65	4.3	4.1	-1.088	0	4.7625	0.92425	1	0.9275	0.92925	0.91575	0.008	0.006	0.005	0.011
Ghana	29.6	22.17	26.2	24.9	-0.158	0	25.7175	0.562	3	0.638	0.53075	0.525	0.018	0.017	0.009	0.02
Greece	14.9	12.19	9.1	9.2	-1.046	0	11.3475	0.8575	1	0.936	0.79825	0.84375	0.006	-0.01	0.013	0.019
Guatemal	14.7	6.66	19	16.6	-0.127	0	14.24	0.6135	3	0.80025	0.45425	0.637	0.021	0.006	0.018	0.032
Guinea-B	34.4	31.15	27.5	31.1	0.094	1	31.0375	0.43275	4	0.54325	0.37	0.4035	0.017	0.008	0.014	0.022
Honduras	13.5	18.75	17.4	16.7	-0.401	0	16.5875	0.6035	3	0.8255	0.4825	0.55125	0.01	0.005	0.01	0.011
Hungary	12.3	9.09	7.7	7.8	-1.025	0	9.2225	0.82825	1	0.8455	0.82	0.81925	0.008	0.008	0.017	0.003
India	16.8	18.87	16.6	22.6	0.106	1	18.7175	0.59575	3	0.72625	0.49975	0.5835	0.026	0.021	0.014	0.034
Indonesi	16.2	17.69	15.3	12.2	-0.927	0	15.3475	0.6745	3	0.7635	0.5955	0.67475	0.017	0.017	0.011	0.02
Iran, Is	35.8	42.37	32.1	20.5	-1.361	0	32.6925	0.769	2	0.8375	0.6945	0.7825	0.02	0.003	0.017	0.036
Iraq	38.1	31.45	20.2	20.7	-1.112	0	27.6125	0.65625	3	0.75475	0.5005	0.74825	0.011	0.015	0.014	0.008
Ireland	8.5	4.74	4.1	4.1	-1.17	0	5.36	0.90825	1	0.93125	0.8845	0.91025	0.016	0.013	0.014	0.018
Israel	5.7	4.74	3.6	4.2	-1.07	0	4.56	0.89125	1	0.94925	0.86475	0.8625	0.008	0.007	0.008	0.007
Italy	9.6	7.22	6.1	5.6	-1.117	0	7.13	0.872	1	0.957	0.7795	0.88875	0.005	-0.003	0.011	0.009
Jamaica	12.3	11.64	11.5	13.6	-0.491	0	12.26	0.71875	2	0.832	0.676	0.65925	0.004	0	-0.002	0.012
Japan	5	5.24	4.7	4.1	-1.072	0	4.76	0.89375	1	0.9735	0.8165	0.89775	0.011	0.004	0.014	0.019
Jordan	34.2	22.85	26.3	24.4	-0.376	0	26.9375	0.72625	2	0.8245	0.6835	0.67875	-0.002	-0.006	0.001	-0.005
Kazakhst	30.6	21.93	24.2	17.6	-0.944	0	23.5825	0.78025	2	0.75	0.79625	0.79625	0.018	0.013	0.059	0.008
Kenya	34.4	20.94	29.1	27.8	0.021	1	28.06	0.53975	4	0.643	0.49975	0.48975	0.019	0.011	0.022	0.014
Republic	12.8	14.08	12	9.8	-0.969	0	12.17	0.88625	1	0.93675	0.8565	0.86875	0.01	0.01	0.017	0.006
Kuwait	16.9	16.52	18.7	17.6	-0.357	0	17.43	0.7975	2	0.8395	0.60375	1	0.008	0.001	0.004	0.012
Kyrgyzst	22.8	19.16	22	15.4	-0.848	0	19.84	0.64775	3	0.7605	0.71175	0.50225	0.015	0.012	0.013	0.015
Lao Peop	18.3	20.42	14.3	16.6	-0.607	0	17.405	0.561	3	0.691	0.44675	0.57175	0.025	0.024	0.016	0.027
Latvia	17.9	10.79	10	9.3	-1.095	0	11.9975	0.8285	1	0.82125	0.856	0.80875	0.011	0.009	0.015	0.007
Lebanon	28.5	22.28	22.6	18.1	-0.833	0	22.87	0.73825	2	0.898	0.6145	0.73	-0.005	-0.004	-0.006	-0.01
Lesotho	26.7	28.37	28.2	28.9	0.184	1	28.0425	0.47375	4	0.418	0.493	0.51825	0.022	0.008	0.081	0.007
Liberia	32.9	19.03	33.7	35.9	0.962	1	30.3825	0.4495	4	0.61925	0.41	0.3575	0.011	0.007	0.017	0.007
Lithuani	22.4	11.1	10.6	8	-1.383	0	13.025	0.8375	1	0.82375	0.86625	0.82375	0.014	0.012	0.026	0.01
Madagasc	33.7	18.37	28.4	28.6	0.197	1	27.2675	0.50475	4	0.6775	0.48075	0.39525	0.008	-0.001	0.018	0.013
Malawi	26	19.49	35	31	0.658	1	27.8725	0.443	4	0.57225	0.429	0.355	0.024	0.009	0.051	0.022
Malaysia	23.6	24.95	24	23.6	-0.175	0	24.0375	0.778	2	0.84275	0.68675	0.81375	0.015	0.013	0.009	0.024
Mali	32.1	23.06	25.6	23.1	-0.449	0	25.965	0.3995	4	0.55125	0.2655	0.4365	0.015	0.005	0.012	0.018
Mauritan	35.5	28.04	24.5	24.7	-0.524	0	28.185	0.49975	4	0.661	0.35125	0.53875	0.014	0.004	0.01	0.02
Mauritiu	11.1	12.16	12.2	13.7	-0.457	0	12.29	0.76025	2	0.82675	0.68275	0.77875	0.02	0.017	0.007	0.03
Mexico	20.7	14.74	12.3	13.1	-0.895	0	15.21	0.74775	2	0.84675	0.6405	0.7715	0.011	0.004	-0.005	0.022
Moldova	15.1	13.88	12.5	9.7	-1.048	0	12.795	0.69	3	0.771	0.70475	0.6045	0.011	0.015	0.012	0.004
Mongolia	19.3	17.82	21	16.5	-0.585	0	18.655	0.7065	2	0.7355	0.7155	0.67025	0.017	0.021	0.007	0.017
Morocco	28.3	18.02	20.8	19.6	-0.554	0	21.68	0.63225	3	0.841	0.476	0.6315	0.024	0.01	0.005	0.038
Mozambiq	34.7	18.45	31.6	30.1	0.317	1	28.7125	0.40375	4	0.525	0.36625	0.34275	0.021	0.017	0.078	0.012
Myanmar	23.4	14.96	20.3	19.9	-0.284	0	19.64	0.53375	4	0.68075	0.4045	0.55325	0.025	0.026	0.022	0.025
Namibia	28.6	25.01	23.9	30.4	0.373	1	26.9775	0.60175	3	0.586	0.5475	0.68025	0.025	0.012	0.041	0.017
Nepal	15.1	15.98	17	15.9	-0.461	0	15.995	0.536	4	0.7405	0.4525	0.46075	0.024	0.016	0.016	0.036
Netherla	4.8	3.85	3.4	3.8	-1.059	0	3.9625	0.917	1	0.93875	0.8845	0.928	0.009	0.001	0.007	0.015
New Zeal	10.1	9.11	6	7.8	-0.954	0	8.2525	0.90425	1	0.93975	0.90375	0.87175	0.008	0.007	0.008	0.01
Niger	37.7	23.68	26.4	26.2	-0.322	0	28.495	0.331	4	0.588	0.194	0.3195	0.023	0.009	0.025	0.026
Nigeria	32.3	33.67	20.5	21.4	-0.913	0	26.9675	0.50275	4	0.48475	0.447	0.587	0.018	0.011	0.012	0.018
The form	6.9	7.86	9.4	6.4	-0.967	0	7.64	0.737	2	0.8445	0.6635	0.714	0.013	0.01	0.004	0.022
Norway	5	4.26	3.8	2.7	-1.191	0	3.94	0.94425	1	0.9435	0.913	0.97725	0.005	0.002	0.004	0.005
Oman	21.3	30.37	25.4	16.1	-1.03	0	23.2925	0.8005	1	0.86225	0.65625	0.90875	0.021	-0.004	0.011	0.048
Pakistan	25.3	17.36	14.2	14.3	-0.989	0	17.79	0.532	4	0.70225	0.37475	0.573	0.016	0.009	0.007	0.021
Panama	12.7	14.05	10	14.3	-0.494	0	12.7625	0.76825	2	0.8785	0.674	0.7655	0.014	0.019	0.009	0.011
Papua Ne	14.2	13.01	16.8	14.2	-0.53	0	14.5525	0.5145	4	0.65325	0.4065	0.51375	0.018	0.018	0.007	0.019
Paraguay	19.7	21.43	20.7	22.7	-0.048	0	21.1325	0.6975	3	0.81475	0.6055	0.6885	0.014	0.013	0.007	0.02
Peru	21.5	15.9	13.9	13.5	-0.911	0	16.2	0.73075	2	0.84325	0.66475	0.69575	0.016	0.018	0.013	0.017
Philippi	20	9.11	10.5	12.3	-0.804	0	12.9775	0.68275	3	0.77075	0.63975	0.6465	0.014	0.017	0.004	0.016
Poland	14.7	11.78	10.3	9.7	-0.977	0	11.62	0.84225	1	0.874	0.8405	0.8135	0.014	0.013	0.017	0.018
Portugal	10.4	11.77	7.8	7.4	-1.078	0	9.3425	0.82875	1	0.928	0.729	0.84125	0.012	0.001	0.011	0.021
Qatar	23.7	14.04	15.2	9.3	-1.371	0	15.56	0.844	1	0.912	0.6595	1	0.004	0.001	0.005	0.005
Romania	12.7	11.06	8.7	10.3	-0.83	0	10.69	0.79625	2	0.8375	0.767	0.787	0.009	0.013	0.008	0.002
Russian	25.2	18.58	18.9	18	-0.636	0	20.17	0.79175	2	0.76075	0.79175	0.82425	0.017	0.004	0.024	0.021
Rwanda	31.6	19.94	32.1	29.7	0.334	1	28.335	0.49125	4	0.67875	0.4305	0.40525	0.023	0.019	0.01	0.017
Saudi Ar	29	24.77	27.4	28.8	0.197	1	27.4925	0.82425	1	0.833	0.72225	0.93325	0.022	0.006	0.002	0.048
Senegal	32.5	19.47	27.2	23.4	-0.336	0	25.6425	0.479	4	0.69	0.31675	0.504	0.019	0.007	0.012	0.023
Serbia	9.8	8.25	7.7	7.4	-0.964	0	8.2875	0.7705	2	0.8375	0.73925	0.7385	0.013	0.006	0.01	0.021
Singapor	4.8	5.09	3.6	2.8	-1.197	0	4.0725	0.911	1	0.9555	0.796	0.9945	0.015	0.005	0.012	0.029
Slovakia	15.1	9.43	6.6	6.1	-1.3	0	9.3075	0.8345	1	0.86	0.8065	0.838	0.012	0.01	0.012	0.013
Slovenia	14.6	7.19	6.4	6.4	-1.193	0	8.6475	0.8825	1	0.91875	0.8765	0.854	0.007	0.001	0.009	0.008
South Af	33.2	31.91	25.1	25.9	-0.429	0	29.0275	0.6695	3	0.6015	0.693	0.72075	0.021	0.003	0.044	0.019
Spain	9.3	5.38	3.7	4.1	-1.213	0	5.62	0.87025	1	0.9565	0.78925	0.873	0.012	0.002	0.01	0.022
Sri Lank	13.5	13.68	17.4	14.9	-0.453	0	14.87	0.75575	2	0.8575	0.739	0.681	0.013	0.02	0.009	0.009
Sudan	34.7	25.11	24.3	25.7	-0.315	0	27.4525	0.47625	4	0.66425	0.31175	0.5215	0.018	0.015	0.005	0.018
Sweden	5.2	2.96	2.8	2.8	-1.152	0	3.44	0.918	1	0.9495	0.882	0.92325	0.011	0.003	0.008	0.021
Switzerl	4.9	4.27	3.3	2.7	-1.188	0	3.7925	0.932	1	0.9615	0.87625	0.961	0.008	0.001	0.009	0.016
Tajikist	14.1	18.08	18.8	18.1	-0.257	0	17.27	0.6305	3	0.75425	0.66425	0.50125	0.013	0.017	0.003	0.007
United R	34.3	22.66	32.9	29.2	0.122	1	29.765	0.49225	4	0.61475	0.40925	0.474	0.018	0.014	0.049	0.009
Thailand	19.6	38.07	36.2	32.7	0.541	1	31.6425	0.72875	2	0.842	0.62075	0.74025	0.015	0.011	0.018	0.016
Timor-Le	16.1	19.48	16.6	12.7	-0.92	0	16.22	0.61075	3	0.729	0.483	0.64775	0.012	0.008	-0.002	0.015
Togo	28.1	17.2	31.1	29.2	0.467	1	26.4	0.47625	4	0.586	0.4705	0.392	0.02	0.015	0.012	0.026
Trinidad	15.5	16.7	14.1	12.1	-0.887	0	14.6	0.787	2	0.80325	0.70625	0.859	0.007	0	0.005	0.01
Tunisia	34.5	18.83	24.4	22.8	-0.443	0	25.1325	0.71975	2	0.851	0.63	0.695	0.011	0.006	0.007	0.018
Turkey	13.4	12.04	8.9	12.3	-0.671	0	11.66	0.75825	2	0.84775	0.6445	0.8	0.027	0.015	0.021	0.045
Uganda	24.7	28.89	27.4	29	0.245	1	27.4975	0.49225	4	0.588	0.48675	0.417	0.019	0.011	0.032	0.014
United A	37.1	12.73	10.9	18.1	-0.843	0	19.7075	0.8355	1	0.871	0.6865	0.9765	0.017	0.002	0.008	0.032
United K	5.4	3.67	2.9	3.1	-1.146	0	3.7675	0.90725	1	0.93075	0.89575	0.8955	0.008	0.002	0	0.016
United S	13.9	11.43	10.6	12.4	-0.661	0	12.0825	0.9115	1	0.902	0.88775	0.945	0.006	0.004	-0.006	0.01
Uruguay	4.3	21.46	16.6	13.4	-0.523	0	13.94	0.785	2	0.8755	0.71225	0.77475	0.014	0.013	0.003	0.021
Uzbekist	9.7	11.32	11.2	11.5	-0.618	0	10.93	0.675	3	0.77	0.6845	0.58375	0.018	0.022	0.01	0.017
Viet Nam	16.1	24.65	24.5	26.4	0.364	1	22.9125	0.66075	3	0.84425	0.592	0.5775	0.017	0.019	-0.005	0.022
Zimbabwe	27.5	14.57	28.2	34.7	1.133	1	26.2425	0.4955	4	0.51075	0.5355	0.448	0.035	0.017	0.086	0.021
